# Supplementary material
Source: Springer Nature journal article supplement (https://www.springermedizin.de/resource/supplementary/12882_2012_516_MOESM1_ESM.pdf/9454282)

**A**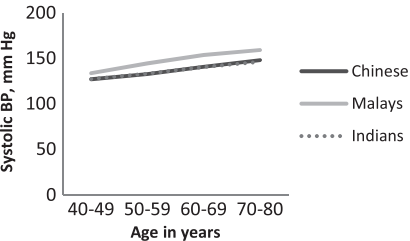**B**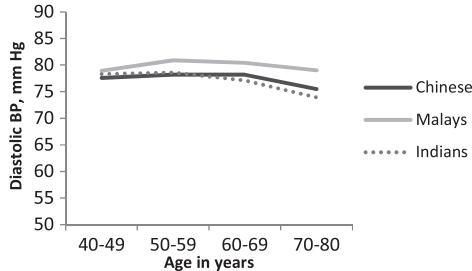

Supplement: MOESM1 [file 9454282]
